# Supplementary material
Source: PubMed Central journal article supplement (PMC4871798)
Supplement: supp_fj.201500064_Supplemental_Figure4.pdf [file supp_fj.201500064_Supplemental_Figure4.pdf]

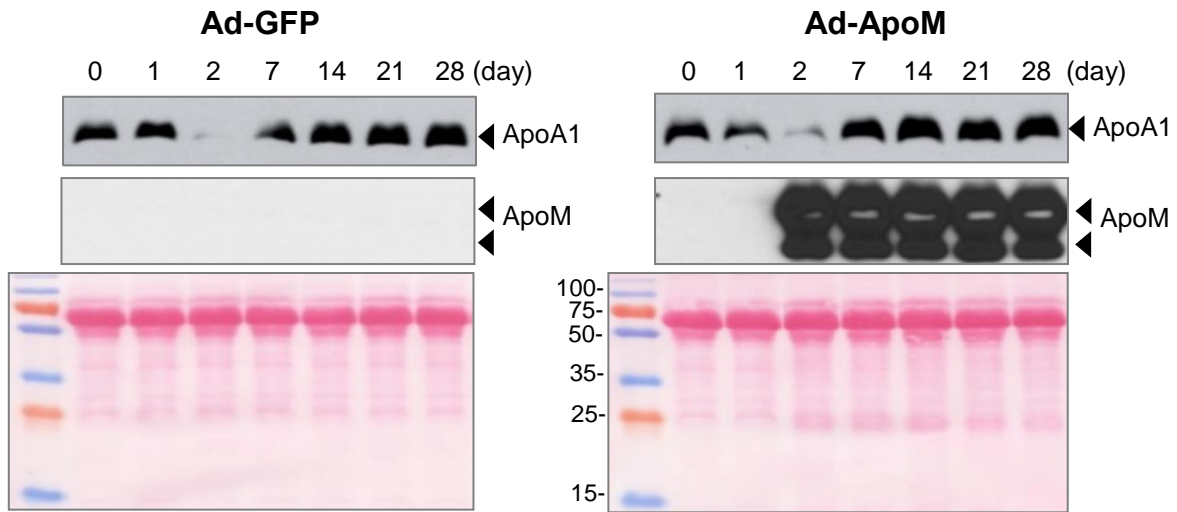

**Supplemental figure 4. Adenovirus-mediated ApoM expression.** *Apom*<sup>-/-</sup> mice were injected i.v. with  $5 \times 10^8$  pfu of Ad-ApoM or Ad-GFP. Blood samples were collected before and 1, 2, 7, 14, 21, and 28 days after injection. 1  $\mu$ l of plasma was analyzed for ApoA1 and human ApoM expression by western blot analysis. Protein loading was visualized by Ponceau staining. The decreased expression of ApoA1 two days post-injection in both Ad-GFP and Ad-ApoM transduced mice is caused by virus-induced liver inflammation, which resolves spontaneously after two days.
